1 Content type: Article

2 **THE SYSTEMATIC CONSERVATION PLANNING FOR INTRASPECIFIC**  
3 **GENETIC DIVERSITY.**

4 Ivan PAZ-VINAS<sup>1,2,3\*</sup>, Géraldine LOOT<sup>1,4</sup>, Virgilio HERMOSO<sup>6</sup>, Charlotte  
5 VEYSSIERE<sup>1,4</sup>, Nicolas POULET<sup>7</sup>, Gaël GRENOUILLET<sup>1,4</sup> and Simon  
6 BLANCHET<sup>1,5</sup>

7

8 <sup>1</sup> Centre National de la Recherche Scientifique (CNRS), Université Paul Sabatier (UPS),  
9 École Nationale de Formation Agronomique (ENFA); UMR 5174 EDB (Laboratoire  
10 Évolution & Diversité Biologique), 118 route de Narbonne, 31062 Toulouse cedex 4,  
11 France.

12 <sup>2</sup> Aix-Marseille Université, CNRS, IRD, Avignon Université; UMR 7263 IMBE, Équipe  
13 EGE, Centre Saint-Charles, Case 36, 3 place Victor Hugo, 13331 Marseille cedex 3,  
14 France.

15 <sup>3</sup> Université de Lyon, CNRS, ENTPE; UMR 5023 LEHNA, Laboratoire d'Écologie des  
16 Hydrosystèmes Naturels et Anthropisés, 6 rue Raphaël Dubois, 69622 Villeurbanne,  
17 France.

18 <sup>4</sup> Université de Toulouse, UPS; UMR 5174 EDB, 118 route de Narbonne, 31062  
19 Toulouse cedex 4, France.

20 <sup>5</sup> CNRS, Station d'Écologie Théorique et Expérimentale; UMR 5321, 09200 Moulis,  
21 France.

22 <sup>6</sup> Centre Tecnologic Forestal de Catalunya, Crta. Sant Llorenç de Monunys, Km 2,  
23 25280, Solsona. Lleida, Spain.

24 <sup>7</sup> Pôle Écohydraulique ONEMA-IMFT, Office National de l'Eau et des Milieux  
25 Aquatiques, France.

26

27 **Running title:** Conservation planning of genetic diversity

28

29 **Keywords:** biodiversity, dendritic ecological networks, fish, freshwater, genetic  
30 diversity, geostatistical tools, microsatellites, river basin, spatial patterns, systematic  
31 conservation planning

32

33 **\*Corresponding author:**

34

35 Ivan PAZ-VINAS

36 Université Lyon 1

37 CNRS, ENTPE, UMR 5023 LEHNA

38 Laboratoire d'Écologie des Hydrosystèmes Naturels et Anthropisés

39 3, rue Raphaël Dubois - Bât. Darwin C

40 69622 Villeurbanne Cedex France

41 Phone: (+33) 04 72 43 26 03

42 E-mail: ivanpaz23@gmail.com

43

44 **Co-author's e-mails:**

45

46 Simon Blanchet: simon.blanchet@sete.cnrs.fr

47 Virgilio Hermoso: virgilio.hermoso@gmail.com

48 Charlotte Veyssière: veyssiere.charlotte@gmail.com

49 Nicolas Poulet: nicolas.poulet@onema.fr

50 Gaël Grenouillet: gael.grenouillet@univ-tlse3.fr

51 Géraldine Loot: geraldine.loot@univ-tlse3.fr

52

## 53     **Introductory paragraph** 54

55             Intraspecific diversity is a fundamental facet of biodiversity allowing species to  
56     adapt to environmental changes. Preserving intraspecific diversity should hence be a  
57     main conservation target, although attempts to identify priority conservation areas for  
58     intraspecific diversity remain scarce. Using molecular data on six freshwater fish  
59     species sampled at a large spatial scale, we determined hot- and cold-spots of genetic  
60     diversity, and identified priority conservation areas using a systematic conservation  
61     planning approach. We demonstrated that the systematic conservation planning of  
62     intraspecific diversity is feasible. However, we found poor levels of congruency and  
63     surrogacy among conservation solutions found for each species, indicating that the  
64     conservation of intraspecific genetic diversity should be species-specific. This was  
65     because of the strong among-species incongruences in hot- and cold-spots of genetic  
66     diversity. Our study demonstrates the usefulness of systematic conservation planning  
67     for preserving intraspecific diversity, and it provides guidelines to identify priority  
68     conservation areas for intraspecific genetic diversity.

69

70             Biodiversity conservation is a major challenge that is often addressed by  
71     identifying protected areas with high biodiversity and/or landscape values<sup>1</sup>.  
72     Conservation areas are generally identified as areas with high proportions of endemic,  
73     rare or iconic species<sup>2</sup>. Alternatively, conservation planning can be based on the concept  
74     of complementarity between conservation areas<sup>3</sup>, and on cost-effectiveness analyses  
75     such as systematic conservation planning methods (hereafter SCP<sup>4</sup>). SCP aims at  
76     identifying a number of sites (i.e. *irreplaceable sites* that should be managed for  
77     conservation in priority) best representing a predefined proportion of the biodiversity  
78     observed in a region, at a minimum cost.

79             There have been attempts to include information on the phylogenetic history of  
80     species assemblages into SCP approaches to preserve both species identities and their  
81     macro-evolutionary history<sup>5,6</sup>. However, genetic diversity observed at the *population*

82 *level* (i.e. within species) has rarely been considered in SCP (but see<sup>7-9</sup>). *Intraspecific*  
 83 *genetic diversity* is a fundamental facet of biodiversity, as it is the fuel for species to  
 84 adapt to global and environmental changes<sup>10-13</sup>. Conservation geneticists have  
 85 classically considered this facet of biodiversity in conservation plans, for instance by  
 86 identifying “Evolutionary Significant Units” or unique genetic lineages<sup>14</sup>. However,  
 87 conservation geneticists have yet ignored the possibility to combine genetic data (e.g.  
 88 allele identities) to dedicated planning tools such as SPC (but see<sup>7,8</sup>).

89       The relative lack of genetic datasets at *large* spatial scales may partly explain  
 90 why SCP has yet rarely been applied to intraspecific genetic diversity<sup>15,16</sup>. Particularly,  
 91 conservation geneticists have been generally restricted by the amount and spatial range  
 92 of datasets (but see<sup>17-19</sup>). However, our capacity to compile genetic datasets at large  
 93 spatial, temporal and taxonomic scales has greatly increased in the last decades<sup>20,21</sup>, so  
 94 that it is now possible to identify priority areas for the conservation of genetic diversity  
 95 using dedicated conservation planning tools.

96       Here, we tested the potential of SCP analyses to identify priority conservation  
 97 areas accounting for intraspecific genetic diversity measured at a large spatial scale. We  
 98 first considered a set of four common and representative freshwater fish species  
 99 (*Squalius cephalus*, *Gobio occitaniae*, *Barbatula barbatula* and *Phoxinus phoxinus*) to  
 100 test the influence of conservation targets (proportion of the total amount of genetic  
 101 diversity to be covered by irreplaceable sites) and analytical strategies (analysing each  
 102 species independently or all species pooled) on final conservation solutions (number  
 103 and identity of irreplaceable sites). We then included two rare species of particular  
 104 conservation interest (*Leuciscus burdigalensis* and *Parachondrostoma toxostoma*) to  
 105 test the relevance of the SCP approach in a “real conservation-oriented study”. For these  
 106 two species (and the four common species), we ran SCP analyses considering a typical

conservation target<sup>22,23</sup> to (i) explore the spatial distribution of irreplaceable sites in a riverscape, and (ii) test for congruency and surrogacy in irreplaceable sites among species, and more particularly between rare and common species. We finally tested whether –or not– irreplaceable sites were correctly predicted by classical indices of genetic diversity (e.g. allelic richness). We demonstrate that preserving the genetic diversity of a species assemblage is a feasible –yet complex– task necessitating appropriate analyses to assist the decision-making process.

## Results

*Descriptive statistics.* We assessed for the six species within-sites intraspecific genetic diversity (i.e.  $\alpha$ -IGD) by calculating both allelic richness ( $AR$ ) and richness in private alleles ( $PA$ ). Overall, *P. toxostoma* (one of the two rare species) showed the lowest  $\alpha$ -IGD. Mean  $AR$  ranged from 2.114 for *P. toxostoma* to 5.821 for *P. phoxinus*, and mean  $PA$  ranged from 0.036 for *P. toxostoma* to 0.162 for *L. burdigalensis* (Table S1). We also assessed among-sites intraspecific genetic diversity (i.e.  $\beta$ -IGD) by quantifying (for each species) how much a site is genetically unique compared to all others (using the  $D_{est}$  index<sup>24</sup>, see the Methods section). *Parachondrostoma toxostoma* also showed the lowest mean  $D_{est}$  value (0.069), while the highest mean value was found for *B. barbatula* (0.383; Table S1).

## Testing the suitability of SCP analyses for intraspecific genetic diversity

130 In this first step we focused on the four common species for which genetic data  
131 were available at a large spatial scale, allowing a thorough exploration of the suitability  
132 of SCP for intraspecific genetic diversity.

133

134 *Spatial patterns of genetic diversity.* Using Generalized Linear Models for Stream  
135 Networks (GLMSSN)<sup>25,26</sup>, we showed that spatial patterns of genetic diversity largely  
136 varied and were actually poorly congruent among the four common fish species (Figure  
137 1). As extreme examples, hotspots of *AR* for *S. cephalus* were mainly found in the  
138 Western part of the network and on the core streams, whereas these same areas were  
139 identified as coldspots of *AR* for *B. barbatula* (Figure 1A1-1A3). Similarly, hotspots of  
140 *PA* were inversely related between *G. occitaniae* and *P. phoxinus* (Figure 1B2-1B4).  
141 Similar conclusions were reached for  $D_{est}$  (Figure 1C). For instance, hotspots of  $D_{est}$   
142 were observed in opposite areas of the river basin for the species pair *B. barbatula*/*P.*  
143 *phoxinus* (Figure 1C3-1C4). As a consequence, the sign, slope and significance of  
144 GLMSSNs explanatory variables strongly varied among species (Figure 1). This  
145 incongruence in spatial patterns of genetic diversity among species was also reflected by  
146 the low to moderate correlation coefficients measured among all possible pairs of  
147 species and for each index of genetic diversity (i.e. *AR*, *PA* and  $D_{est}$ , Table S2). Indeed,  
148 Pearson's correlation coefficients were lower than 0.6 for all comparisons but two (i.e.  
149 between *B. barbatula*/*G. occitaniae* and between *P. phoxinus*/*B. barbatula* for *AR*, see  
150 Table S2).

151

152 *The influence of conservation targets and analytical strategies to identify irreplaceable*  
153 *sites for genetic conservation.* We used alleles' presence/absence data combined to SCP  
154 procedures to test the influence of conservation targets and analytical strategies on the

155 number and identity of irreplaceable sites (i.e. sites that were selected in all the solutions  
156 in SCP analyses; see the Methods section for more details).

157 When species were analysed independently, we found that the number of  
158 irreplaceable sites increased as the conservation target (i.e. the percentage of alleles to  
159 be covered by irreplaceable sites) increased, with a steep increase for conservation  
160 targets higher than 75% of the total number of alleles present at the river basin scale  
161 (Figure 2). However, the percentage of irreplaceable sites strongly varied among  
162 species. For instance, for a 90% conservation target –which is a common target in  
163 conservation genetics<sup>22</sup>–, the proportion of irreplaceable sites ranged from 3.61% of the  
164 total number of sampled sites for *G. occitaniae* to 28.57% for *P. phoxinus* (Table S3;  
165 Figure 2). For extreme conservation targets (100% of alleles to be covered), the  
166 proportion of irreplaceable sites varied from 25.30% for *G. occitaniae* to 68.26% for *P.*  
167 *phoxinus* (Table S3; Figure 2).

168 When alleles from the four common species were analysed in a single pooled  
169 analysis, we similarly found that the proportion of irreplaceable sites increase as the  
170 conservation target increases (Figure 2). Interestingly, we did not identify irreplaceable  
171 sites for the 30% conservation goal, and only 3 irreplaceable sites were found for the  
172 50% conservation goal (Figure 2). The proportion of irreplaceable sites increased  
173 moderately to 17.39% for the 75% target, and then steeply increased for higher  
174 conservation targets to reach 55.70% for the 90% target and 76.08% for the 100% target  
175 (Figure 2). This later result suggests that almost all the river basin should be protected  
176 to reach high conservation targets when adopting a pooled strategy.

177

178 A real conservation-oriented study using SCP approaches

179

180           We here focused on two rare species (in addition to the four common species) to  
181 explore the usefulness of SCPs in a real case study.

182

183 *Identification of irreplaceable sites for genetic conservation.* We first visually explored  
184 the spatial distribution of irreplaceable sites. Overall, the localization of irreplaceable  
185 sites in the riverscape strongly varied among species, being spread all over the river  
186 basin (Figure 3). We failed to identify areas (e.g. upstream or downstream locations)  
187 clustering irreplaceable sites for any species (Figure 3A-F). This apparent lack of  
188 clustering was statistically confirmed by our generalized linear models (Table S4).  
189 Indeed, the two positional indices we used as explanatory variables (i.e. distance from  
190 the outlet of sampling sites and the betweenness centrality of each sampling site, see the  
191 Methods section) were not significant predictors of the irreplaceability of sites for all  
192 species, except for distance from the outlet for *P. phoxinus* (Table S4). This indicates  
193 that neither the position of sites in the riverscape, nor the positional importance of these  
194 sites, determine the irreplaceability of sites.

195           Second, we tested whether conservation solutions found for each species were  
196 spatially congruent among species. Over the six fish species, we identified forty-two  
197 sites (out of the ninety-two sites, i.e. 45.65%) as irreplaceable at the 90% conservation  
198 target for at least one species (Figure 4). Thirty-two of these forty-two sites were  
199 irreplaceable for at least one of the four common species (Figure 4), and fourteen of the  
200 forty-two sites were irreplaceable for at least one of the two rare species (Figure 4).  
201 Among the six species, only eight out of these forty-two sites were irreplaceable for at  
202 least two species, and only one of these sites was irreplaceable for three species (Figure  
203 4).

204



205 *Surrogacy in irreplaceable sites among species.* We tested whether solutions found for  
 206 one species can be used as a surrogate for other species by calculating the percentage of  
 207 the total number of alleles observed for a given species that is covered by irreplaceable  
 208 sites identified for another species. Levels of surrogacy were generally low to moderate,  
 209 and strongly varied among species pairs (Table 1). For instance, irreplaceable sites  
 210 identified for *G. occitaniae* failed to cover the genetic diversity of the two rare species,  
 211 and covered only 17.66 to 42.60% of the total number of alleles of the other common  
 212 species. This indicates that irreplaceable sites identified for *G. occitaniae* (i.e. the most  
 213 widespread species) are poor surrogates for preserving the intraspecific genetic diversity  
 214 of other species (18.38% of surrogacy; Table 1). Conversely, irreplaceable sites found  
 215 for *P. phoxinus* and *L. burdigalensis* are better surrogates for *G. occitaniae*, as 79.58%  
 216 and 70.27% of the total number of alleles of *G. occitaniae* was covered by irreplaceable  
 217 sites identified for *P. phoxinus* and *L. burdigalensis* respectively (Table 1). Overall,  
 218 irreplaceable sites best covering genetic diversity of other species were those identified  
 219 for *B. barbatula*, which covered in average 68.28% of the total number of alleles of  
 220 other species (Table 1).

221 Interestingly, the thirty-two irreplaceable sites identified for the four common  
 222 species covered 79.87% and 90% of the total number of alleles of *L. burdigalensis* and  
 223 *P. toxostoma* respectively, suggesting that irreplaceable sites identified for a set of  
 224 common species can be good surrogates for intraspecific genetic diversity of rare  
 225 species. Conversely, the fourteen irreplaceable sites identified for the two rare species  
 226 covered a total number of alleles ranging from 65.18% for *S. cephalus* to 79.40% for *B.*  
 227 *barbatula*.

228

229 *Relationships between genetic indices and irreplaceable sites.* For all species but *G.*  
 230 *occitaniae* and *P. toxostoma* (for which none of the variables were significant  
 231 predictors), *PA* was identified as the only variable that significantly predicted the  
 232 probability for a site to be identified as an irreplaceable site (Table S5). This probability  
 233 increased with the number of *PA* in a site.

234

## 235 **Discussion**

236

237 Intraspecific diversity constitutes the fuel for species and populations to cope  
 238 with environmental changes<sup>10-12</sup>. This biodiversity facet is hence the first that should  
 239 respond to global change, allowing populations and species to respond adaptively to  
 240 these changes<sup>13</sup>. However, this biodiversity facet has so far been poorly integrated in  
 241 dedicated optimization planning tools (but see<sup>7,8</sup>). We here fill this gap by  
 242 demonstrating that the systematic conservation planning of intraspecific genetic  
 243 diversity is a feasible –yet complex– task necessitating careful considerations.

244

245 *From idiosyncratic distributions of genetic diversity...*

246 Our results strongly suggest that the genetic diversity of the targeted species did  
 247 not follow a common spatial pattern, but rather species-specific (idiosyncratic) spatial  
 248 distributions. This conclusion holds true for all genetic diversity indices, and it  
 249 corroborates the few previous studies investigating simultaneously the spatial  
 250 distribution of genetic diversity at large spatial scales and for sympatric species  
 251 (e.g.<sup>17,27</sup>). This was however unexpected given that recent meta-analyses on freshwater  
 252 organisms demonstrated that  $\alpha$ -IGD is generally higher in downstream than in upstream  
 253 areas<sup>28</sup>, and that  $\beta$ -IGD tends to be higher in upstream than in downstream sections<sup>29</sup>.

Overall, these very general spatial patterns of intraspecific genetic diversity were verified in our datasets. For instance, a negative relationship between allelic richness and distance from the outlet is expected in freshwater organisms<sup>28</sup>, and was actually observed for three out of the six species considered in this study (Figure S1). However, when using a precise and novel approach to map genetic diversity across the network, we demonstrated that the distribution of cold- and hot-spots of  $\alpha$ - and  $\beta$ -IGD was subtler and idiosyncratic. This probably reflects interactions between colonization histories, life-history-traits of species and the network structure, which are expected to drive patterns of genetic diversity in rivers<sup>28,30,31</sup>.

263

...to the systematic conservation planning of intraspecific genetic diversity.

The spatial mismatch in intraspecific genetic diversity among species probably explains why we found that the level of congruency and surrogacy of irreplaceable sites identified for each species was extremely low. For instance, there was an extremely low proportion of irreplaceable sites that were common to two or three species (and never more than three species; Figure 4). In the same way, we detected no clear patterns in the spatial distribution of irreplaceable sites. In riverscapes, it is generally assumed that small upstream areas are the “source” of genetic uniqueness, and hence the primary areas to protect (i.e. the “small but mighty” paradigm<sup>29</sup>). Our results did not confirm this paradigm since irreplaceable sites (for any of the six species) were not particularly situated in upstream areas and/or in areas of high connectivity (i.e. areas displaying high centrality values<sup>18,32</sup>), and rather suggests that priority areas for the conservation of intraspecific genetic diversity should cover the whole distribution range of species. Finally, the level of surrogacy among irreplaceable sites was low to moderate, and never attained the 90% threshold we assumed when we considered all species

279 independently<sup>22,23</sup>. Combined to our finding that the number of irreplaceable sites can  
 280 be relatively high for reasonable conservation targets (up to 46% sites are identified as  
 281 irreplaceable sites for at least one species at the conservation target of 90%), we  
 282 concluded that our ability to identify priority areas for intraspecific genetic diversity is  
 283 highly species-specific and depends on the capacity to tackle the trade-off between the  
 284 amount of genetic diversity to protect, and the extent of priority areas we can  
 285 realistically protect.

286       However, when surrogacy between all irreplaceable sites identified for the entire  
 287 set of common species and those identified for the rare species was tested, we reached  
 288 reasonable proportions of the total number of alleles to protect (~80-90%) for the two  
 289 rare species (i.e. *P. toxostoma* and *L. burdigalensis*). This result suggests that, in some  
 290 cases, genetic data obtained for a set of widely-distributed, “easier-to-sample” common  
 291 species displaying varying life-history traits can be used for identifying protection areas  
 292 for the intraspecific genetic diversity of other sympatric rare species that can be more  
 293 problematic to sample.

294       Overall, our results suggest that two different analytical strategies can be  
 295 employed in real-case SCP studies aiming at preserving intraspecific genetic diversity  
 296 (i) identification of conservation areas for each rare species independently or (ii)  
 297 identification of conservation areas for a set of representative common species. Both  
 298 strategies have their own advantages and inconveniences. The first strategy optimally  
 299 preserves genetic diversity of rare species at competitive costs (e.g. 14 irreplaceable  
 300 sites to protect in our demonstrative study), but this at the expense of the genetic  
 301 diversity of other sympatric species. Conversely, the second strategy will optimally  
 302 preserve genetic diversity of a set of common species while maintaining high levels of  
 303 genetic diversity for rare species, but this at a higher cost (e.g. 32 irreplaceable sites to

304 protect in our study). Whether to choose one of these two strategies will therefore  
 305 depend on many factors such as how difficult is the sampling of rare species compared  
 306 to common species, or the extent of the resources available for setting new protected  
 307 areas. We recommend however to adopt the second strategy when possible, since it  
 308 allows to simultaneously maintain genetic diversity from rare and common species.  
 309 Indeed, genetic diversity of common species is vital for ensuring ecosystem stability, as  
 310 it ultimately influence species interactions, population dynamics and ecosystem  
 311 functions<sup>33</sup>, and we argue that it should be considered in conservation plans.

312

## 313 **Conclusions**

314

315 Our study provides novel, insightful and promising knowledge on the setting of  
 316 priority conservation areas for intraspecific diversity. It shows that systematic  
 317 conservation planning methods are useful objective tools for conservation geneticists  
 318 whose conservation solutions will strikingly depend on the species to be preserved and  
 319 the quantity of genetic information that managers aim at preserving in a landscape.  
 320 Given our results, we suggest that two strategies could be employed in real-case  
 321 conservation programs: (i) identification of priority conservation areas for each rare  
 322 species independently or (ii) identification of priority conservation areas on the basis of  
 323 the analysis of a set of representative common species that may serve as “umbrellas” for  
 324 rare sympatric species.

325 Our study also raises many additional questions that should be considered in the  
 326 near future. Among others, we believe that the next steps will be to formally identify  
 327 sound conservation targets for intraspecific diversity, to test whether neutral  
 328 intraspecific diversity appropriately mirrors quantitative and adaptive diversity<sup>12</sup>, and to

quantify the influence of intraspecific diversity on ecosystem functioning and services,  
so as to better evaluate the added value of preserving such a facet of biodiversity<sup>12,34</sup>.

## Methods

### Data collection

*Biological models.* We focused on an assemblage of six Cyprinid freshwater fish species. Three of them are widespread in Europe (i.e. *Squalius cephalus*, *Phoxinus phoxinus* and *Barbatula barbatula*) whereas three of them (*Gobio occitaniae*, *Leuciscus burdigalensis* and *Parachondrostoma toxostoma*) are endemic to Southern France<sup>35</sup>.

This set of species covers a large functional trait space that is representative of many freshwater fish communities. For instance, *S. cephalus* is a large-bodied fish species with long lifespan (i.e. it can be 60 cm long and live up to 15 years<sup>35</sup>) whereas at the extreme *P. phoxinus* is a small-bodied species with shorter lifespan (i.e. it is less than 12 cm long and usually lives up to 4-5 years<sup>35</sup>). From an ecological perspective, *G. occitaniae*, *P. toxostoma* and *B. barbatula* are bottom feeders, whereas *S. cephalus* and *P. phoxinus* are water column feeders and *L. burdigalensis* is more opportunistic. Further, *B. barbatula* is mainly active during night, while the other species are particularly active during the day. Four of these species are relatively abundant (i.e. *S. cephalus*, *G. occitaniae*, *P. phoxinus* and *B. barbatula*), although they greatly vary in their ecological niche and hence their spatial occupancy in the river network (see Figure S2 for maps representing the spatial distribution of sampling sites for each species, which roughly corresponds to their spatial distribution in the Garonne-Dordogne river basin). We will hereafter refer to this set of species as the “common” species. The two

other species are rare (*L. burdigalensis*) to very rare (*P. toxostoma*; see Figure S2) in the Garonne-Dordogne river basin, and are of particular interest for conservation. *Leuciscus burdigalensis* is a recently described species that is locally experiencing both demographic and genetic bottlenecks in many populations<sup>36,37</sup>. *Parachondrostoma toxostoma* is a vulnerable species<sup>38</sup> listed in the IUCN red list, in the Annex II of the European Union Habitats Directive and in Appendix III of the Bern Convention<sup>38</sup>.

360

*Sampling design.* During Spring/Summer 2010-2011, we used electric-fishing to sample ninety-two sites distributed across thirty-five rivers from a large river basin, the Garonne-Dordogne River basin (>100,000 km<sup>2</sup>, South-Western France; Figure S2; Table S6). Sampling sites were chosen to cover the whole distribution range of each species at the riverscape scale, and to allow characterising spatial patterns of genetic diversity for all these species. Up to 25 individuals *per species per site* were sampled when possible. Not all species were present at all sampling sites (Figure S2; Table S6), and some species were at a density that did not allow reaching the 25 individuals threshold. In these cases, we captured as many individuals as possible. We anesthetized each individual and then we collected and stored in 90% ethanol a fragment of their pelvic fin. All individuals were released alive at their sampling location.

372

*Genotyping.* Genomic DNA was extracted using a salt-extraction protocol<sup>39</sup>. We used multiplexed Polymerase Chain Reactions (PCRs) to co-amplify 8 to 15 microsatellite loci depending on the species (8 for *G. occitaniae*, 9 for *B. barbatula*, 10 for *S. cephalus* and *P. phoxinus*, 14 for *L. burdigalensis* and 15 for *P. toxostoma*). We used 5-20 ng of genomic DNA and QIAGEN® Multiplex PCR Kits (Qiagen, Valencia, CA, USA) to perform PCR amplifications. Details on loci, primer concentrations, PCR conditions and

379 multiplex sets can be found in Table S7. The genotyping was conducted on an ABI  
380 PRISM™ 3730 Automated Capillary Sequencer (Applied Biosystems, Foster City, CA,  
381 USA). The scoring of allele sizes was done using GENEMAPPER® v.4.0 (Applied  
382 Biosystems).

383

384 *Genetic diversity assessment.* Given the good spatial resolution of the sampling obtained  
385 for the four common species (i.e. *S. cephalus*, *G. occitaniae*, *P. phoxinus* and *B.*  
386 *barbatula*), descriptive genetic analyses were conducted for sampling sites displaying a  
387 minimum sample size of N=10 individuals for these species, so as to maximize  
388 consistency on subsequent allelic frequency-based genetic analyses (see Figure S2 and  
389 Table S6 for details on sample sizes). For the two rare species, for which the sampling  
390 was more restricted (i.e. *L. burdigalensis* and *P. toxostoma*), genetic analyses were  
391 conducted for sampling sites displaying a minimum sample size of N=6 individuals, so  
392 as to maximize the number of sampling sites included in the SCP procedures. We then  
393 determined for each of the six species the occurrence of null alleles and potential  
394 scoring errors with the program MICROCHECKER 2.3<sup>40</sup>. We tested for departures  
395 from Hardy-Weinberg (HW) equilibrium with the ‘adegenet’ R package v1.6-2<sup>41</sup>. The  
396 program GENEPOP v4.0<sup>42</sup> was used to assess linkage disequilibrium among loci within  
397 sites. We found significant deviations from HW for a few locus/population pairs for  
398 each six species (see Appendix A1 and Supplementary File 1 for details and raw tables),  
399 and significant linkage disequilibrium and homozygote excesses for only the four  
400 common species (Appendix A1; Supplementary File 1). However, no clear patterns  
401 were observed for any species across loci and populations for these deviations. Given  
402 the small extent of these deviations and given the large spatial extent of the databases,



we assumed that they weakly affected our main findings (Appendix A1; Supplementary File 1).

To assess within-sites intraspecific genetic diversity (i.e.  $\alpha$ -IGD), we applied rarefaction procedures implemented in ADZE v1.0<sup>43</sup> to calculate both allelic richness ( $AR^{44}$ ) and private allelic richness ( $PA^{45}$ ) at the sampling site level (based on a minimum of N=10 individuals for common species or N=6 individuals for rare species). To assess the among-sites component of intraspecific genetic diversity (i.e.  $\beta$ -IGD), we used the R package ‘mmod’<sup>46</sup> to calculate –for each species– a pairwise genetic differentiation index (i.e.  $D_{est}^{24}$ ). For each site (and species), we then derived the averaged value of all pairwise  $D_{est}$  values estimated between one given site and all the remaining sites, so as to obtain a single value *per* site.

#### Testing the suitability of SCP analyses for intraspecific genetic diversity

In the first step, we tested the influence of conservation targets and analytical strategies on final conservation solutions. In this step, we focused specifically on data from the four common species, as their large coverage of the sampling area is more suited for the demonstrative exercise done in this step.

*Spatial patterns of genetic diversity.* We first used geostatistical modelling tools to explore spatial patterns of  $\alpha$  and  $\beta$  genetic diversity for the four common species at the riverscape scale by predicting the distributions of  $AR$ ,  $PA$  and  $D_{est}$  from the observed empirical values using Generalized Linear Models for Spatial Stream Networks (GLMSSN<sup>25,26</sup>). This was done using the ‘STARS’ toolset of ARCGIS v10.2 and the R package ‘SSN’<sup>25,26</sup>. We conducted a model selection procedure based on a comparison

of Akaike Information Criteria (AIC) estimated for several competing GLMSSNs. These models were built by (i) assuming three geographic descriptors (i.e. topological distance from the outlet, longitude and latitude) as explanatory variables, and (ii) choosing a tail-down covariance structure model among the following ones: exponential, Matérn, spherical, linear-with-sill and Epanechnikov. As the number of explanatory variables differed among the GLMSSNs we built, we used the maximum likelihood estimation method for each GLMSSN, so as to allow AIC-based model comparisons. For each common species and genetic index, the best model had the lowest AIC score (see Supplementary File 1 for raw results). This model was used to estimate the slope and the significance of the relationships between explanatory variables and each genetic index, so as to test whether or not spatial patterns of intraspecific genetic diversity can be detected. We finally used predictions from the best models to produce krigged maps for each common species and each genetic index, so as to visually represent the spatial distribution of intraspecific genetic diversity across the whole river drainage, and to visually highlight hot- and cold-spots of intraspecific genetic diversity. We also calculated Pearson's correlation coefficients between values calculated at the site level for each genetic index (i.e.  $AR$ ,  $PA$  and  $D_{est}$ ) for each pair of common species, so as to test for spatial congruency in patterns of genetic diversity among common species.

*Identification of irreplaceable sites.* We then tested whether conservation targets (i.e. the percentage of total number of conservation units to be present in the final conservation solution) and analytical approaches (i.e. species-specific or species-pooled analyses) influence the identification of irreplaceable sites. SCP methods traditionally use species presence/absence data as input data to identify irreplaceable sites for the

conservation of taxonomic diversity at the community level (i.e. sites that cannot be excluded from an optimal selection of sites for conservation)<sup>47</sup>. Here, we replaced species presence/absence data by alleles' presence-absence data to identify irreplaceable sites for the conservation of intraspecific genetic diversity of each species in the river drainage. We used the program Marxan v2.1<sup>47</sup> and genetic data from the common species to identify, for each common species independently, an optimal set of sites that best represent at least 50, 75, 90 or 100% of the total number of alleles present in the whole riverscape at a minimum "cost", which corresponds to four conservation targets. Given the lack of ground estimates for conservation cost, we used a constant cost *per* site, so our objective translated into identifying the minimum number of sites that represent a given proportion of intraspecific genetic diversity (i.e. 50, 75, 90 or 100% of the total pool of alleles represented at least once<sup>48</sup>). We arbitrarily choose the 50, 75 and 100% conservation targets to explore how the proportion of alleles to protect affects the selection of irreplaceable sites. We additionally tested the 90% conservation target, as it corresponds to a threshold target being typically assumed in *ex-situ* conservation plans<sup>22,23</sup>. In order to estimate the relevance of each site to preserve a given proportion of the allelic diversity in the river basin, we used two different methods. In case of 100% of allelic diversity, we used the traditional irreplaceability measure reported by Marxan, which ranges between 100% (highly irreplaceable) and 0% (not irreplaceable). This measure is estimated by running the optimization algorithm a number of times (N=100 runs in our case) and then computing the frequency of selection of each site within the solutions obtained. Sites with unique allelic composition will be selected across all runs and reported as highly irreplaceable, whereas sites with more common alleles, replaceable by other sites with the same alleles, will appear poorly irreplaceable. For the other conservation targets, we selected a random pull of 50, 75 and 90% of the

total number of alleles existing at the basin level and for each species. We then ran the optimization algorithm to identify the minimum set of sites representing this particular selection of alleles. Given that the analyses were run only on a subset of alleles, we replicated this process 100 times to minimize the effect of the arbitrary selection of alleles. For each subset of alleles, we ran the Marxan procedure as explained above (e.g. constant cost and 100 runs for each) and retained the best solution for subsequent analyses (solution with the lowest value for the objective function). We then calculated the irreplaceability as the frequency of selection of each site within the 100 random pull of alleles. For a given species and a given conservation target, we considered a site as irreplaceable for genetic diversity conservation when it displayed an irreplaceability value of 100%. We selected such a high threshold so as to be conservative. We tested and compared visually how the proportions of irreplaceable sites vary among species and conservation targets.

To test how pooling data from several species affect the identification of irreplaceable sites, we further performed a “pooled” analysis, in which all alleles found for each common species at a site were pooled together in a single input dataset. We then selected a random pull of 30, 50, 75, 90 and 100% of the total number of alleles existing at the basin level (all common species confounded), and performed 100 Marxan runs *per* conservation targets to identify the minimum set of sites representing these particular selections of alleles.

#### A real conservation-oriented study using SCP approaches

In this second step, we (i) explored the spatial distribution of irreplaceable sites, (ii) tested whether conservation solutions found for each species are congruent among

species, (iii) tested whether solutions found for one species can be used as a surrogate for other species, and (iv) tested whether –or not– irreplaceable sites are correctly predicted by classical indices of genetic diversity. In this step, we included the two rare species, since congruency and surrogacy are particularly important to measure for rare species for which data are more difficult to collect. We therefore focus more specifically on the comparisons implying common vs. rare species.

*Identification of irreplaceable sites for genetic conservation.* We focused only on irreplaceable sites identified for the 90% target and used the program Marxan as described above to identify these sites for *L. burdigalensis* and *P. toxostoma* independently, in addition of the four common species.

We mapped these irreplaceable sites (for the six species pooled or independently) on the river network, so as to test (i) whether or not specific areas harboured more irreplaceable sites (e.g. upstream areas that are generally thought to be of high conservation priority<sup>29</sup>) and (ii) if irreplaceable sites are spatially congruent among species and, most notably, among common and rare species. In addition, we ran GLMs (assuming a binomial error terms distribution) including whether or not a site has been designated as an irreplaceable site at the 90% target as a binomial dependent variable, and distance to the outlet of sampling sites and betweenness centrality values<sup>49,50</sup> for each sites explanatory variables. Betweenness centrality is an index quantifying the positional importance of each sampling site within the river basin<sup>18,32</sup>. The significance of each term was tested at the  $\alpha=0.05$  threshold.

*Surrogacy in irreplaceable sites among species.* We then estimated the levels of surrogacy among species by calculating the percentage of the total number of alleles

528 observed for a given species that is covered by irreplaceable sites identified for another  
 529 species. Although surrogacy was calculated for all species pairs, we specifically focused  
 530 on rare species by calculating (i) the percentage of the total number of alleles observed  
 531 for rare species covered by all the irreplaceable sites identified for all the common  
 532 species, and (ii) the percentage of the total number of alleles observed for common  
 533 species covered by all the irreplaceable sites identified for the rare species.

534

535 *Relationships between irreplaceable sites and indices of genetic diversity.* To test the  
 536 ability of classical genetic indices to predict the propensity for a site to be irreplaceable  
 537 from a conservation viewpoint, we ran for each species Generalized Linear Models  
 538 (GLMs, with a binomial error terms distribution) including whether or not a site has  
 539 been designated as an irreplaceable site at the 90% target as a binomial dependent  
 540 variable, and  $AR$ ,  $PA$  and  $D_{est}$  as explanatory variables. We tested the significance of  
 541 each term at the  $\alpha=0.05$  threshold. Explanatory variables were centred and scaled, in  
 542 order to compare the relative strength of the predictors among species.

543

## 544 **Acknowledgements**

545

546 We are very grateful to all the ONEMA staff that contributed to the field  
 547 sampling, in particular Laurence Blanc. Leslie Faggiano, Charlotte Evangelista,  
 548 Christine Lauzeral, Loïc Tudesque, Roselyne Étienne, Sébastien Villéger, Julien  
 549 Cucherousset, Vincent Dubut, Alain Blanchet and South-Western France ONEMA staff  
 550 are thanked for their help in the field. Roselyne Étienne and Vincent Dubut are also  
 551 thanked for their help with molecular analyses. Lisa Fourtune is acknowledged for  
 552 having calculated the betweenness centrality values of our river network. We also thank

553 Marie-Hélène Lizée for her help with GIS tools and Camille Pagès for her comments.  
 554 Further, the authors thank the “Génopole Toulouse” for help with genotyping and Keoni  
 555 Saint-Pée for correcting the English. IPV was financially supported by a MESR  
 556 (“Ministère de l'Enseignement Supérieur et de la Recherche”) PhD scholarship during  
 557 this study. VH was funded by the National Environmental Research Program Northern  
 558 Australia Hub and a “Ramon y Cajal” contract (RYC-2013-13979) funded by the  
 559 Spanish government. This study is part of the European project “IMPACT”. This  
 560 project has been carried out with financial support from the Commission of the  
 561 European Communities, specific RTD programme “IWRMNET”. This work has been  
 562 done in two research units (EDB & SETE) that are part of the “Laboratoire  
 563 d'Excellence” (LABEX) entitled TULIP (ANR-10-LABX-41).

564

## 565 **References**

566

- 567 1. Watson, J. E. M., Dudley, N., Segan, D. B. & Hockings, M. The performance and  
 568 potential of protected areas. *Nature* **515**, 67–73 (2014).
- 569 2. Filipe, A. F. *et al.* Selection of priority areas for fish conservation in Guadiana River  
 570 Basin, Iberian Peninsula. *Conserv. Biol.* **18**, 189–200 (2004).
- 571 3. Kirkpatrick, J. B. An iterative method for establishing priorities for the selection of  
 572 nature reserves: An example from Tasmania. *Biol. Conserv.* **25**, 127–134 (1983).
- 573 4. Margules, C. R. & Pressey, R. L. Systematic conservation planning. *Nature* **405**,  
 574 243–253 (2000).
- 575 5. Asmyhr, M. G., Linke, S., Hose, G. & Nipperess, D. A. Systematic conservation  
 576 planning for groundwater ecosystems using phylogenetic diversity. *PLoS ONE* **9**,  
 577 e115132 (2014).

- 578 6. Buerki, S. *et al.* Incorporating evolutionary history into conservation planning in  
579 biodiversity hotspots. *Philos. Trans. R. Soc. B Biol. Sci.* **370**, 20140014–20140014  
580 (2015).
- 581 7. Thomassen, H. A. *et al.* Mapping evolutionary process: a multi-taxa approach to  
582 conservation prioritization. *Evol. Appl.* **4**, 397–413 (2011).
- 583 8. Diniz-Filho, J. A. F. *et al.* Planning for optimal conservation of geographical  
584 genetic variability within species. *Conserv. Genet.* **13**, 1085–1093 (2012).
- 585 9. Hermoso, V. *et al.* Species distributions represent intraspecific genetic diversity of  
586 freshwater fish in conservation assessments. *Freshw. Biol.* **61**, 1707–1719 (2016).
- 587 10. Hoffmann, A. A. & Sgrò, C. M. Climate change and evolutionary adaptation.  
588 *Nature* **470**, 479–485 (2011).
- 589 11. Carroll, S. P. *et al.* Applying evolutionary biology to address global challenges.  
590 *Science* **346**, 1245993–1245993 (2014).
- 591 12. Mittell, E. A., Nakagawa, S. & Hadfield, J. D. Are molecular markers useful  
592 predictors of adaptive potential? *Ecol. Lett.* **18**, 772–778 (2015).
- 593 13. Rey, O., Danchin, E., Mirouze, M., Loot, C. & Blanchet, S. Adaptation to global  
594 change: A transposable element–epigenetics perspective. *Trends Ecol. Evol.* **31**,  
595 514–526 (2016).
- 596 14. Pritchard, J. K., Stephens, M. & Donnelly, P. Inference of population structure  
597 using multilocus genotype data. *Genetics* **155**, 945–959 (2000).
- 598 15. Grantham, H. S., Pressey, R. L., Wells, J. A. & Beattie, A. J. Effectiveness of  
599 biodiversity surrogates for conservation planning: Different measures of  
600 effectiveness generate a kaleidoscope of variation. *PLoS ONE* **5**, e11430 (2010).



- 601 16. Hermoso, V., Januchowski-Hartley, S. R. & Pressey, R. L. When the suit does not  
602 fit biodiversity: Loose surrogates compromise the achievement of conservation  
603 goals. *Biol. Conserv.* **159**, 197–205 (2013).
- 604 17. Taberlet, P. *et al.* Genetic diversity in widespread species is not congruent with  
605 species richness in alpine plant communities. *Ecol. Lett.* **15**, 1439–1448 (2012).
- 606 18. Fourtune, L., Paz-Vinas, I., Loot, G., Prunier, J. G. & Blanchet, S. Lessons from the  
607 fish: a multi-species analysis reveals common processes underlying similar species-  
608 genetic diversity correlations. *Freshw. Biol.* **61**, 1830–1845 (2016).
- 609 19. Seymour, M., Seppälä, K., Mächler, E. & Altermatt, F. Lessons from the  
610 macroinvertebrates: species-genetic diversity correlations highlight important  
611 dissimilar relationships. *Freshw. Biol.* **61**, 1819–1829 (2016).
- 612 20. Andrew, R. L. *et al.* A road map for molecular ecology. *Mol. Ecol.* **22**, 2605–2626  
613 (2013).
- 614 21. Pauls, S. U. *et al.* Integrating molecular tools into freshwater ecology: developments  
615 and opportunities. *Freshw. Biol.* **59**, 1559–1576 (2014).
- 616 22. Frankham, R., Briscoe, D. A. & Ballou, J. D. *Introduction to conservation genetics*.  
617 (Cambridge University Press, 2002).
- 618 23. Neel, M. C. & Cummings, M. P. Effectiveness of conservation targets in capturing  
619 genetic diversity. *Conserv. Biol.* **17**, 219–229 (2003).
- 620 24. Jost, L. G(ST) and its relatives do not measure differentiation. *Mol. Ecol.* **17**, 4015–  
621 4026 (2008).
- 622 25. Peterson, E. & Ver Hoef, J. M. V. STARS: An ArcGIS toolset used to calculate the  
623 spatial information needed to fit spatial statistical models to stream network data. *J.*  
624 *Stat. Softw.* **56**, 1–17 (2014).

- 625 26. Ver Hoef, J., Peterson, E., Clifford, D. & Shah, R. SSN: An R package for spatial  
626 statistical modeling on stream networks. *J. Stat. Softw.* **56**, 1–43 (2014).
- 627 27. Fortuna, M. A., Albaladejo, R. G., Fernandez, L., Aparicio, A. & Bascompte, J.  
628 Networks of spatial genetic variation across species. *Proc. Natl. Acad. Sci.* **106**,  
629 19044–19049 (2009).
- 630 28. Paz-Vinas, I., Loot, G., Stevens, V. M. & Blanchet, S. Evolutionary processes  
631 driving spatial patterns of intraspecific genetic diversity in river ecosystems. *Mol.*  
632 *Ecol.* **24**, 4586–4604 (2015).
- 633 29. Finn, D. S., Bonada, N., Múrria, C. & Hughes, J. M. Small but mighty: headwaters  
634 are vital to stream network biodiversity at two levels of organization. *J. North Am.*  
635 *Benthol. Soc.* **30**, 963–980 (2011).
- 636 30. Paz-Vinas, I. & Blanchet, S. Dendritic connectivity shapes spatial patterns of  
637 genetic diversity: a simulation-based study. *J. Evol. Biol.* **28**, 986–994 (2015).
- 638 31. Thomaz, A. T., Christie, M. R. & Knowles, L. L. The architecture of river networks  
639 can drive the evolutionary dynamics of aquatic populations. *Evolution* **70**, 731–739  
640 (2016).
- 641 32. Altermatt, F. Diversity in riverine metacommunities: a network perspective. *Aquat.*  
642 *Ecol.* **47**, 365–377 (2013).
- 643 33. Mimura, M. *et al.* Understanding and monitoring the consequences of human  
644 impacts on intraspecific variation. *Evol. Appl.* **10**, 121–139 (2017).
- 645 34. Siefert, A. *et al.* A global meta-analysis of the relative extent of intraspecific trait  
646 variation in plant communities. *Ecol. Lett.* **18**, 1406–1419 (2015).
- 647 35. Kottelat, M. & Freyhof, J. *Handbook of European freshwater fishes*. (Publications  
648 Kottelat, 2007).

- 649 36. Poulet, N., Beaulaton, L. & Dembski, S. Time trends in fish populations in  
650 metropolitan France: insights from national monitoring data. *J. Fish Biol.* **79**, 1436–  
651 1452 (2011).
- 652 37. Paz-Vinas, I., Quéméré, E., Chikhi, L., Loot, G. & Blanchet, S. The demographic  
653 history of populations experiencing asymmetric gene flow: combining simulated  
654 and empirical data. *Mol. Ecol.* **22**, 3279–3291 (2013).
- 655 38. Paz-Vinas, I. *et al.* Combining genetic and demographic data for prioritizing  
656 conservation actions: insights from a threatened fish species. *Ecol. Evol.* **3**, 2696–  
657 2710 (2013).
- 658 39. Aljanabi, S. M. & Martinez, I. Universal and rapid salt-extraction of high quality  
659 genomic DNA for PCR-based techniques. *Nucleic Acids Res.* **25**, 4692–4693  
660 (1997).
- 661 40. Van Oosterhout, C., Hutchinson, W. F., Wills, D. P. M. & Shipley, P. micro-  
662 checker: software for identifying and correcting genotyping errors in microsatellite  
663 data. *Mol. Ecol. Notes* **4**, 535–538 (2004).
- 664 41. Jombart, T. adegenet: a R package for the multivariate analysis of genetic markers.  
665 *Bioinformatics* **24**, 1403–1405 (2008).
- 666 42. Rousset, F. genepop’007: a complete re-implementation of the genepop software for  
667 Windows and Linux. *Mol. Ecol. Resour.* **8**, 103–106 (2008).
- 668 43. Szpiech, Z. A., Jakobsson, M. & Rosenberg, N. A. ADZE: a rarefaction approach  
669 for counting alleles private to combinations of populations. *Bioinformatics* **24**,  
670 2498–2504 (2008).
- 671 44. Petit, R. J., El Mousadik, A. & Pons, O. Identifying populations for conservation on  
672 the basis of genetic markers. *Conserv. Biol.* **12**, 844–855 (1998).

- 673 45. Kalinowski, S. T. Counting alleles with rarefaction: Private alleles and hierarchical  
674 sampling designs. *Conserv. Genet.* **5**, 539–543 (2004).
- 675 46. Winter, D. J. mmod: an R library for the calculation of population differentiation  
676 statistics. *Mol. Ecol. Resour.* **12**, 1158–1160 (2012).
- 677 47. Ball, I. R., Possingham, H. P. & Watts, M. in *Spatial conservation prioritisation:*  
678 *Quantitative methods and computational tools* (eds. Moilanen, A., Wilson, K. A. &  
679 Possingham, H. P.) **Chapter 14**, 185–195 (Oxford Iniversity Press, Oxford, UK,  
680 2009).
- 681 48. Hermoso, V. & Kennard, M. J. Uncertainty in coarse conservation assessments  
682 hinders the efficient achievement of conservation goals. *Biol. Conserv.* **147**, 52–59  
683 (2012).
- 684 49. Freeman, L. C. A set of measures of centrality based on betweenness. *Sociometry*  
685 **40**, 35 (1977).
- 686 50. Estrada, E. & Bodin, Ö. Using network centrality measures to manage landscape  
687 connectivity. *Ecol. Appl.* **18**, 1810–1825 (2008).

688

689 **Author Contributions:** The study was designed by SB, GL and IPV. IPV and SB  
690 wrote the manuscript with the help of VH, GG, NP and GL. IPV, SB, GL and CV  
691 collected the samples. GL and CV produced the genetic data. IPV, VH and SB  
692 conducted the population genetic and statistical analyses.

693

694 **Competing Financial Interests statement:** Authors declare not having any competing  
695 financial interest.

696

**TABLE 1:** Table reporting for each species the percentages of their total number of alleles that are covered by the sampling sites having been identified as irreplaceable sites for the other species (considering the 90% conservation target).

| Proportion of alleles from (below) that fell within irreplaceable sites from (right): | <i>Squalius cephalus</i> | <i>Gobio occitaniae</i> | <i>Barbatula barbatula</i> | <i>Phoxinus phoxinus</i> | <i>Leuciscus burdigalensis</i> | <i>Parachondrostoma toxostoma</i> | Common species | Rare species |
|---------------------------------------------------------------------------------------|--------------------------|-------------------------|----------------------------|--------------------------|--------------------------------|-----------------------------------|----------------|--------------|
| <i>Squalius cephalus</i>                                                              | 90.00                    | 17.66                   | 61.52                      | 56.52                    | 61.60                          | 39.73                             | —              | 65.18        |
| <i>Gobio occitaniae</i>                                                               | 65.60                    | 90.00                   | 66.76                      | 79.58                    | 70.27                          | 50.97                             | —              | 73.40        |
| <i>Barbatula barbatula</i>                                                            | 49.79                    | 31.65                   | 90.00                      | 79.57                    | 76.78                          | 38.95                             | —              | 79.40        |
| <i>Phoxinus phoxinus</i>                                                              | 48.25                    | 42.60                   | 68.43                      | 90.00                    | 63.49                          | 44.61                             | —              | 68.88        |
| <i>Leuciscus burdigalensis</i>                                                        | 44.73                    | 0                       | 66.13                      | 67.09                    | 90.00                          | 36.42                             | 79.87          | —            |
| <i>Parachondrostoma toxostoma</i>                                                     | 78.55                    | 0                       | 78.55                      | 50.00                    | 67.14                          | 90.00                             | 90.00          | —            |
| Average over all other species                                                        | 55.58                    | 18.38                   | 68.28                      | 66.55                    | 67.86                          | 42.14                             |                |              |

## Figures legends

### Figure 1

Spatial distribution of observed (coloured circles) and interpolated (coloured lines) values of  $AR$ ,  $PA$  and  $D_{est}$  (A, B, C respectively in the figure) for *Squalius cephalus*, *Gobio occitaniae*, *Barbatula barbatula*, and *Phoxinus phoxinus* (1, 2, 3, 4 respectively in the figure) obtained with GLMSSNs. The width of coloured lines is inversely related to the prediction standard error. The cursor on the vertical coloured scale indicates the mean value of  $AR$ ,  $PA$  and  $D_{est}$ . The slope ( $\beta$ ) of each explanatory variable (i.e. topological distance to the outlet, longitude and latitude) and its significance is also reported. N.I. indicates that the explanatory variable has not been included in the model; \* p-value <0.05; \*\* p-value <0.01; \*\*\* p-value <0.001.

### Figure 2

Percentage of irreplaceable sites identified by Marxan for conservation targets of 50, 75, 90 and 100% of the total number of alleles present in the river basin for each common species and for a pooled analysis in which all alleles from all common species were pooled together.  $N_{SITES}$  represents the number of sites included in the Marxan analyses.

### Figure 3

Irreplaceable sites that have been identified for each species by Marxan for preserving 90% of the total number of alleles present in the river basin (red-filled circles).

### Figure 4

724 Irreplaceable sites that have been identified by Marxan for at least one (unicoloured-filled  
725 points), two (black dotted circles surrounding bicoloured points) or three (black bolded circle  
726 surrounding a tricoloured point) species, assuming a conservation target of 90% of the total  
727 number of alleles present in the river basin when considering the six species.



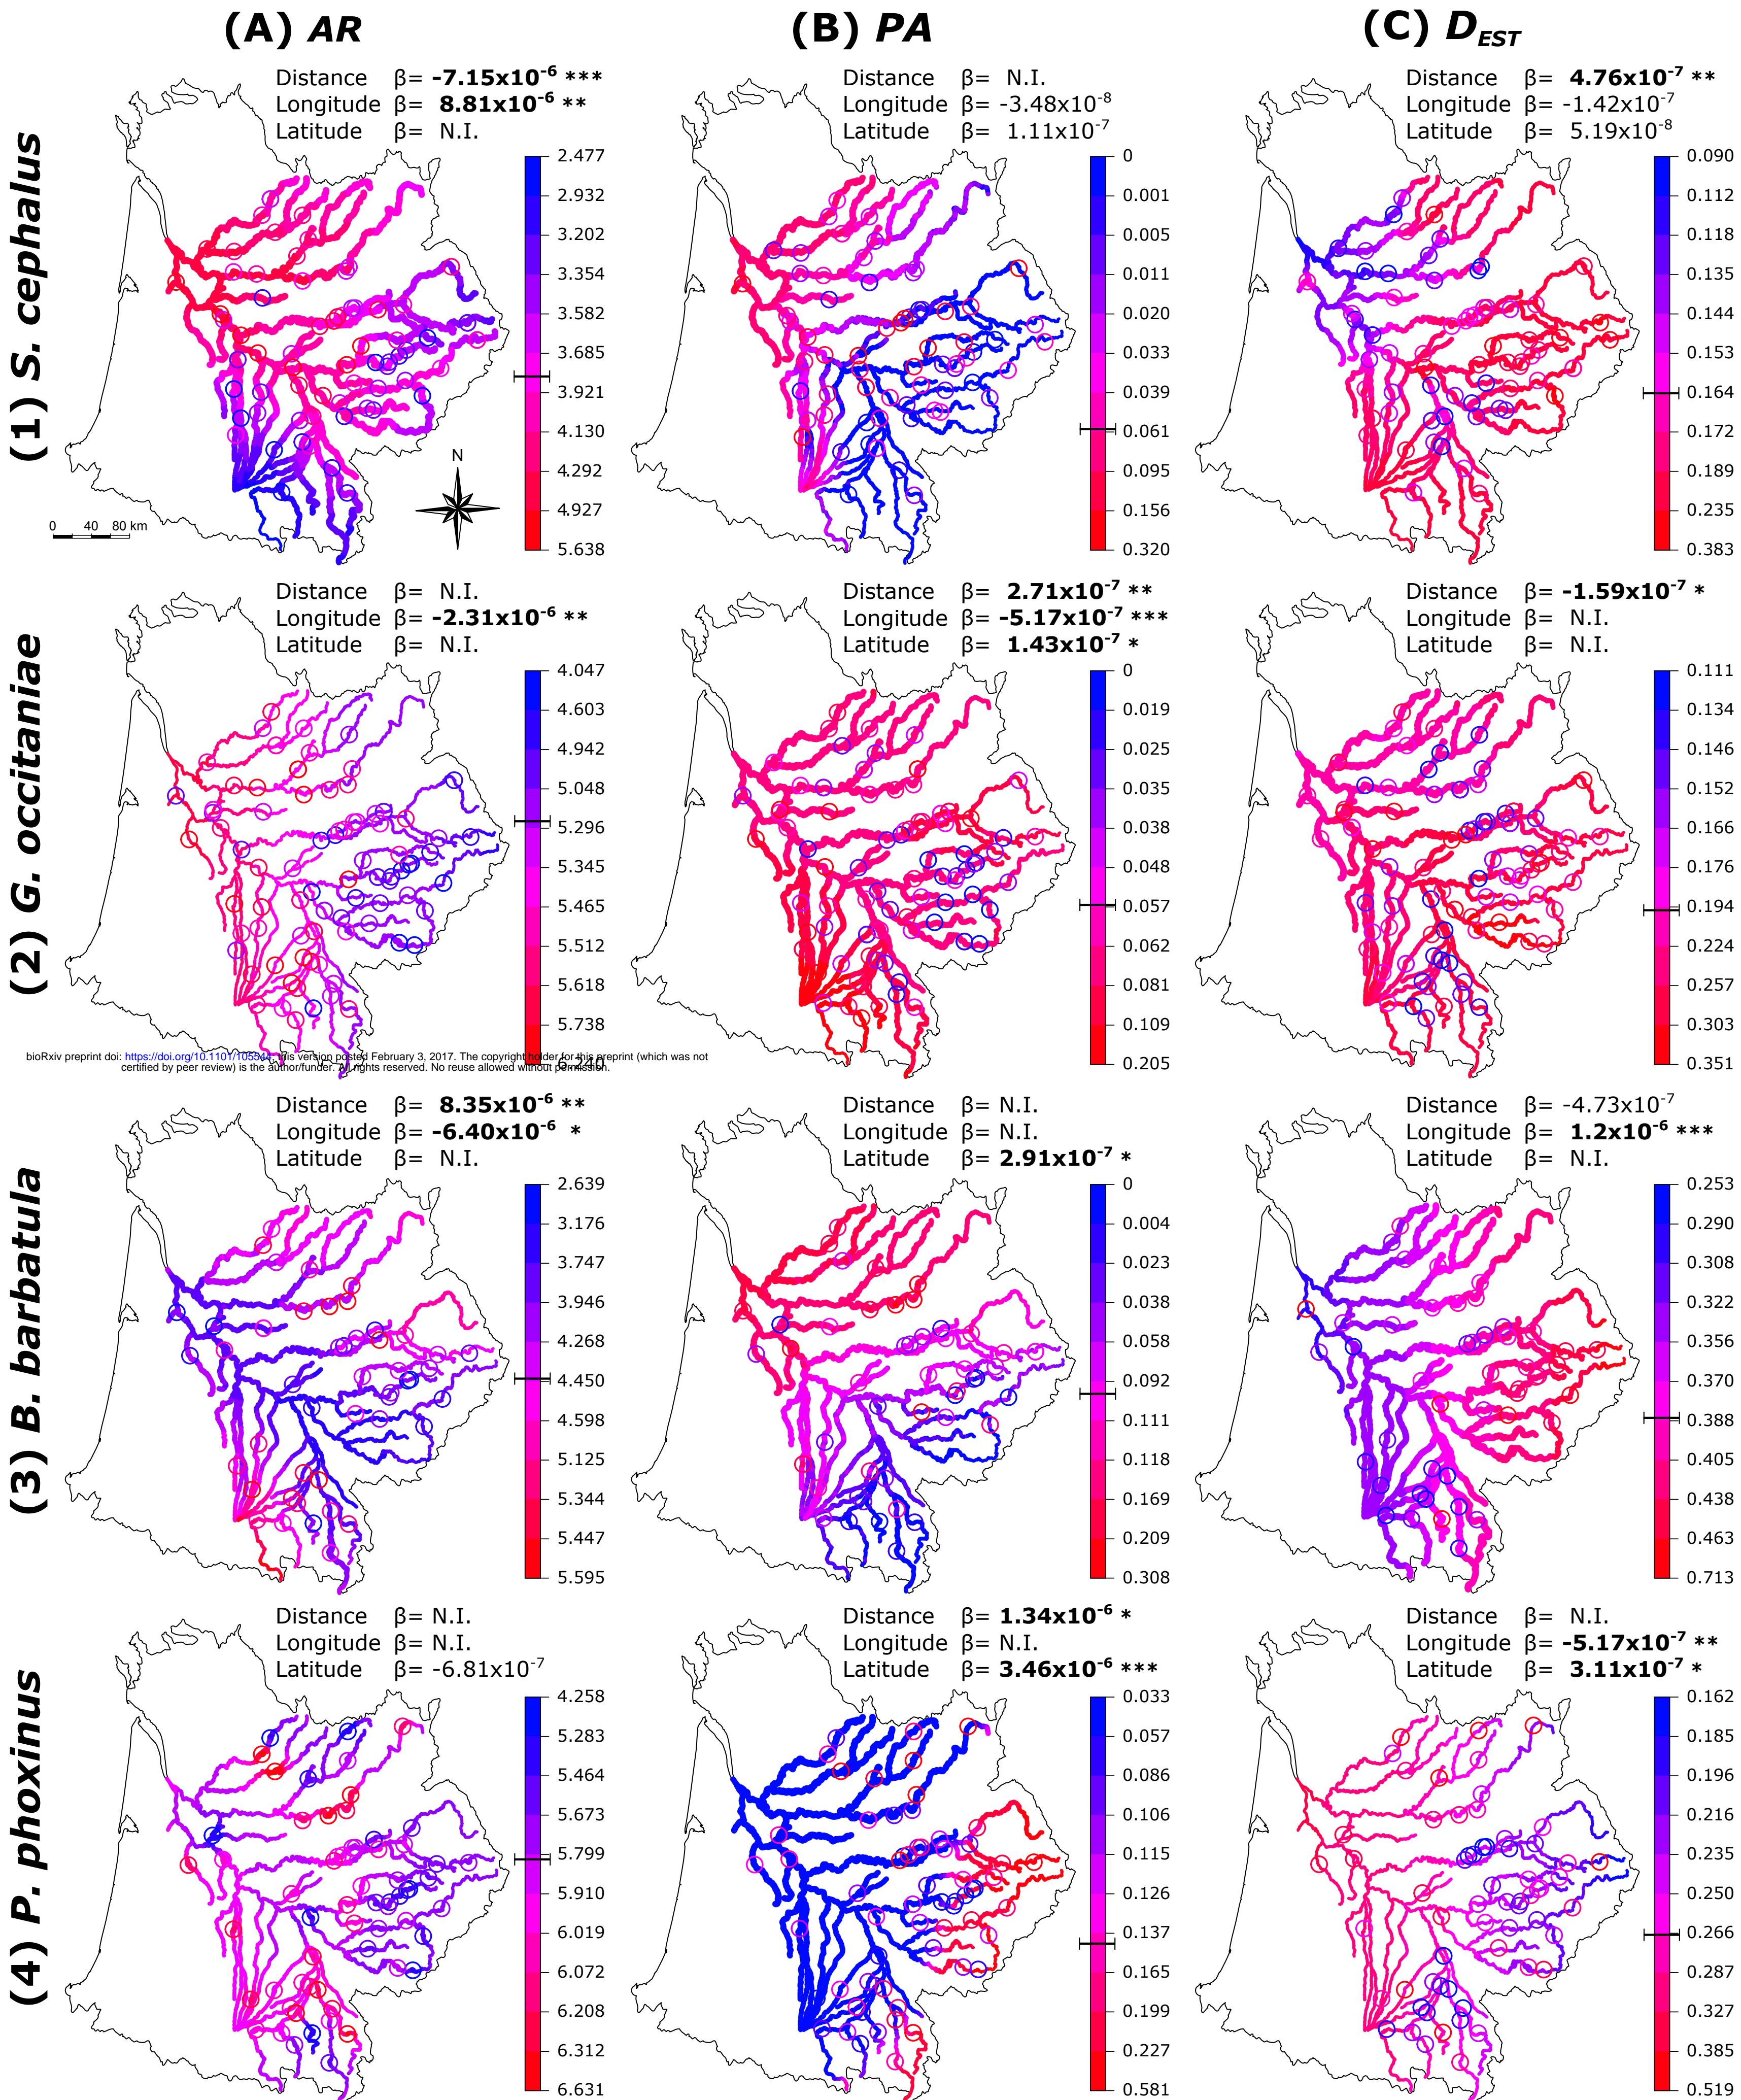



Percentage of irreplaceable sites

*All species pooled together*

$N_{\text{SITES}} = 92$

*P. phoxinus*

$N_{\text{SITES}} = 63$

*S. cephalus*

$N_{\text{SITES}} = 66$

*G. occitaniae*

$N_{\text{SITES}} = 83$

*B. barbatula*

$N_{\text{SITES}} = 48$

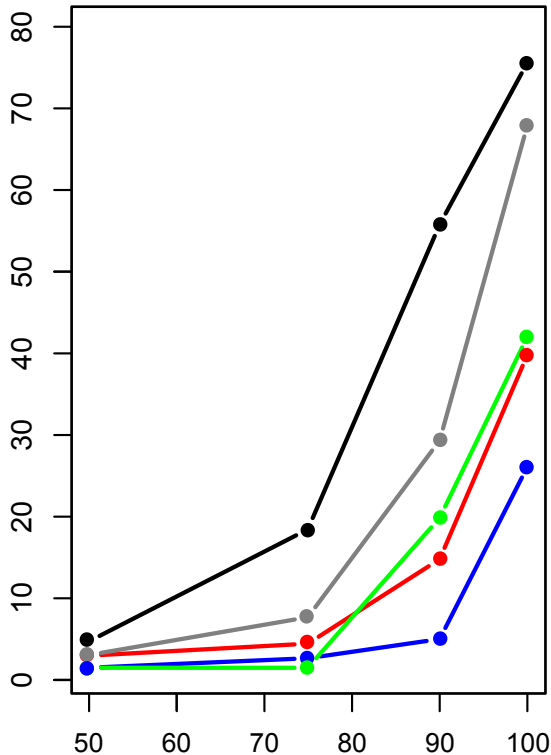

Conservation goal

(Percentage of the total number of alleles to protect)

A *S. cephalus*

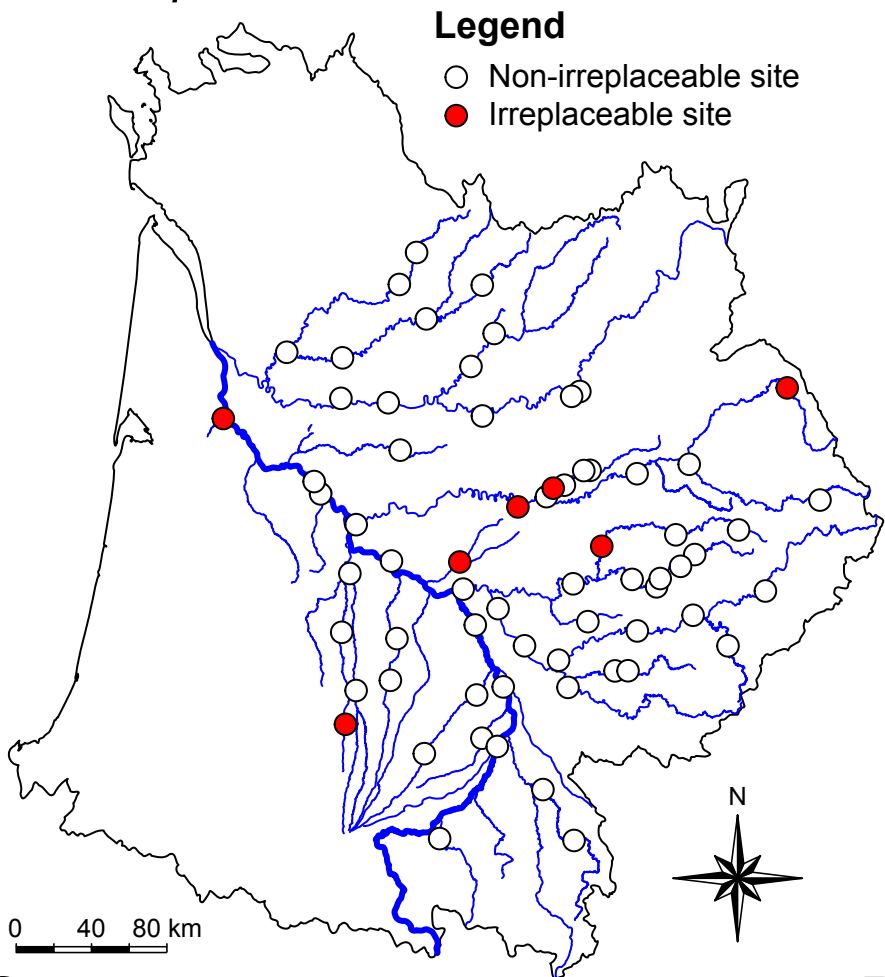

B *G. occitaniae*

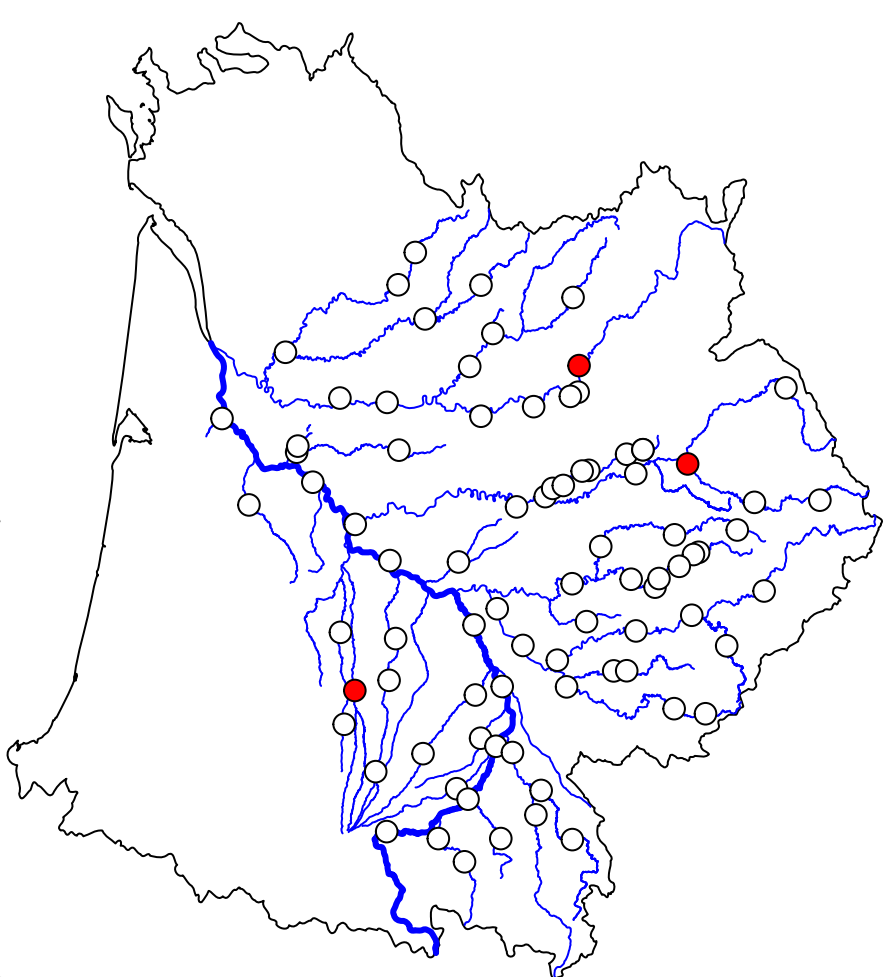

C *B. barbatula*

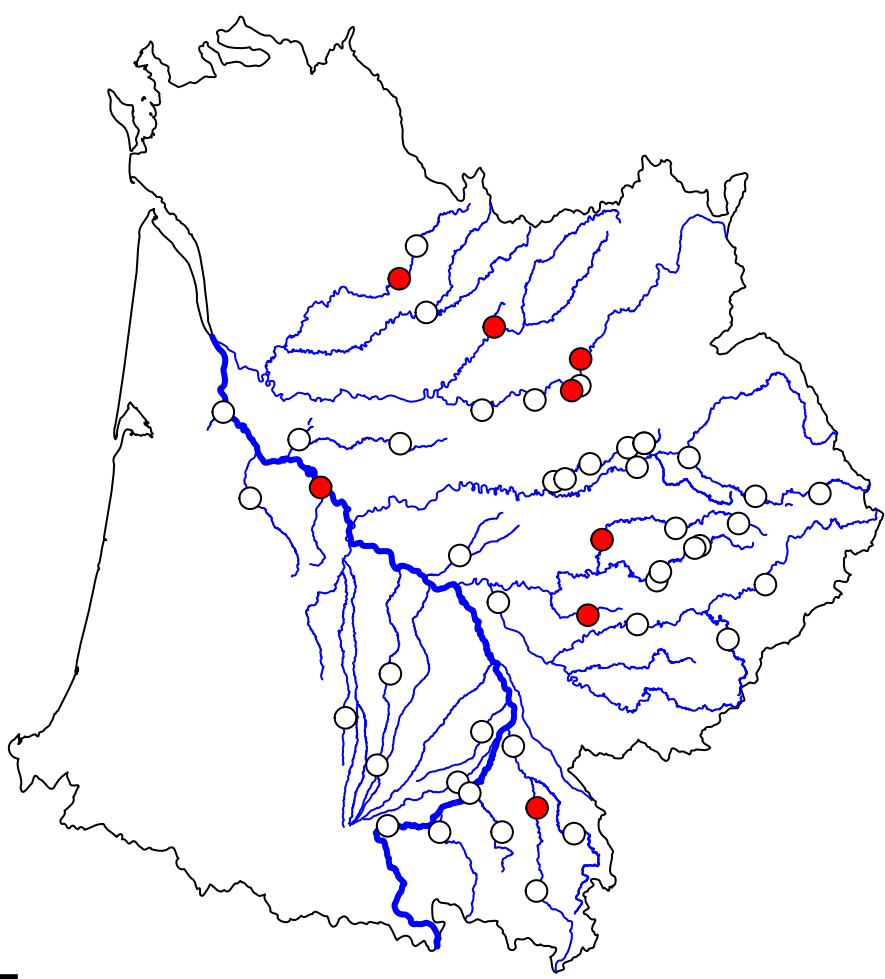

D *P. phoxinus*

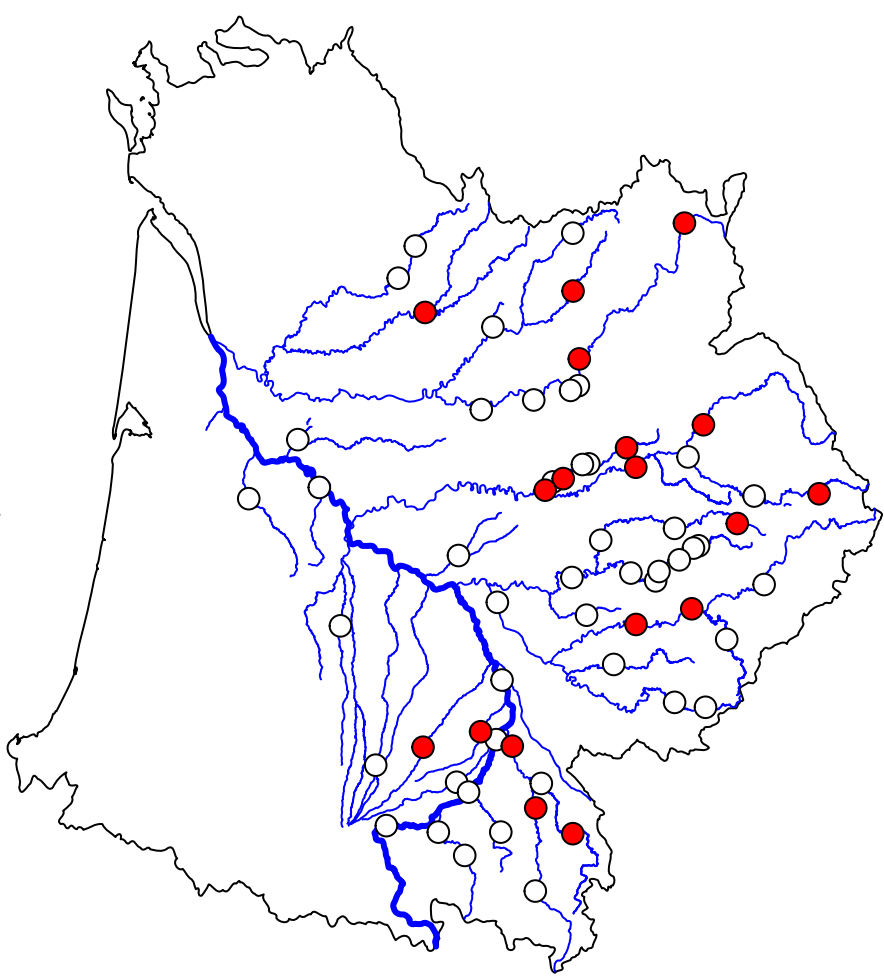

E *L. burdigalensis*

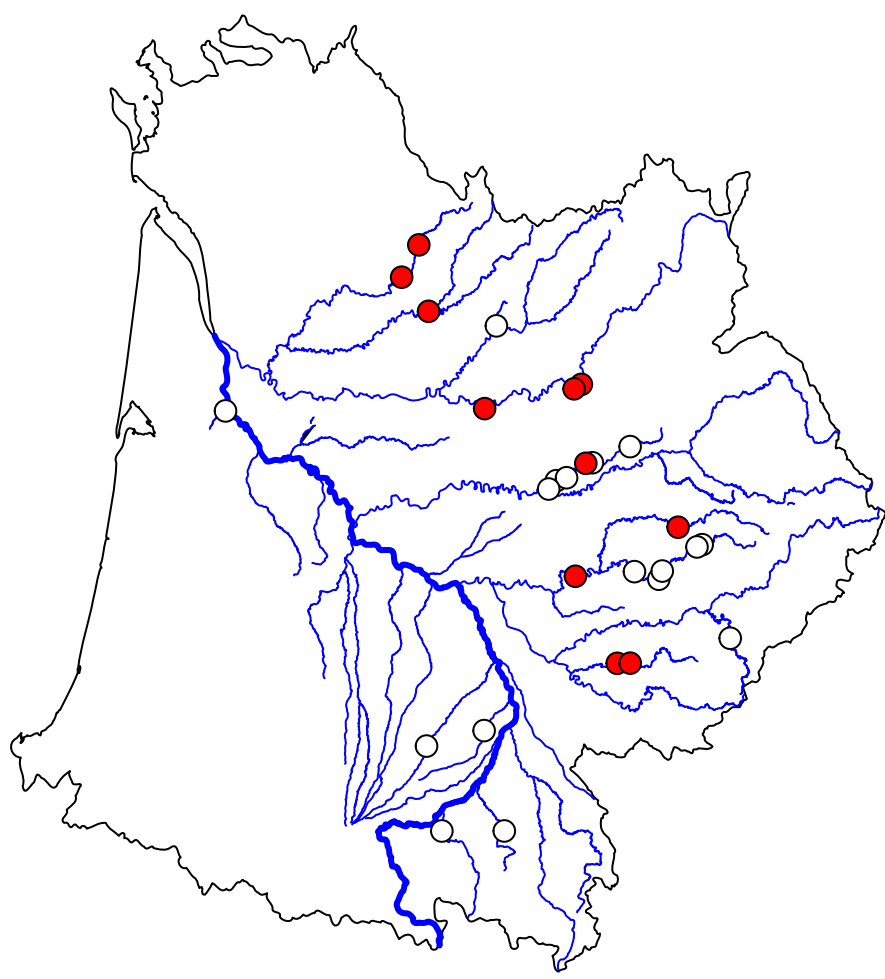

F *P. toxostoma*

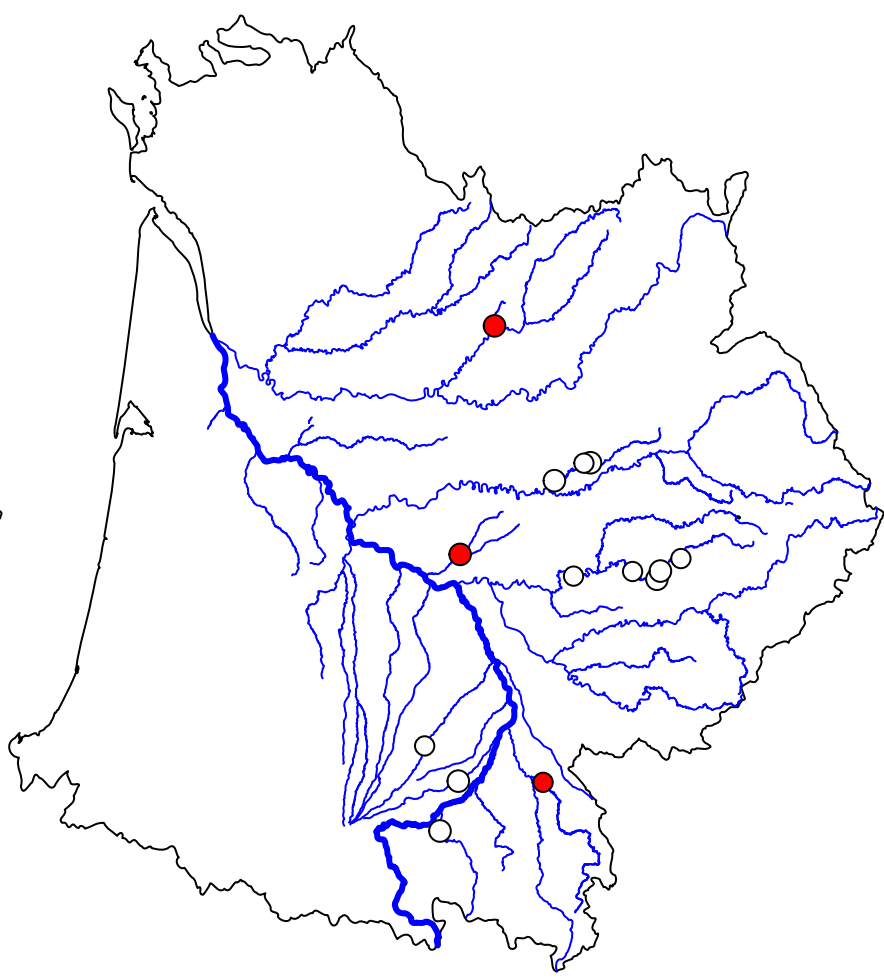

bioRxiv preprint doi: <https://doi.org/10.1101/105544>; this version posted February 5, 2017. The copyright holder for this preprint (which was not certified by peer review) is the author/funder. All rights reserved. No reuse allowed without permission.

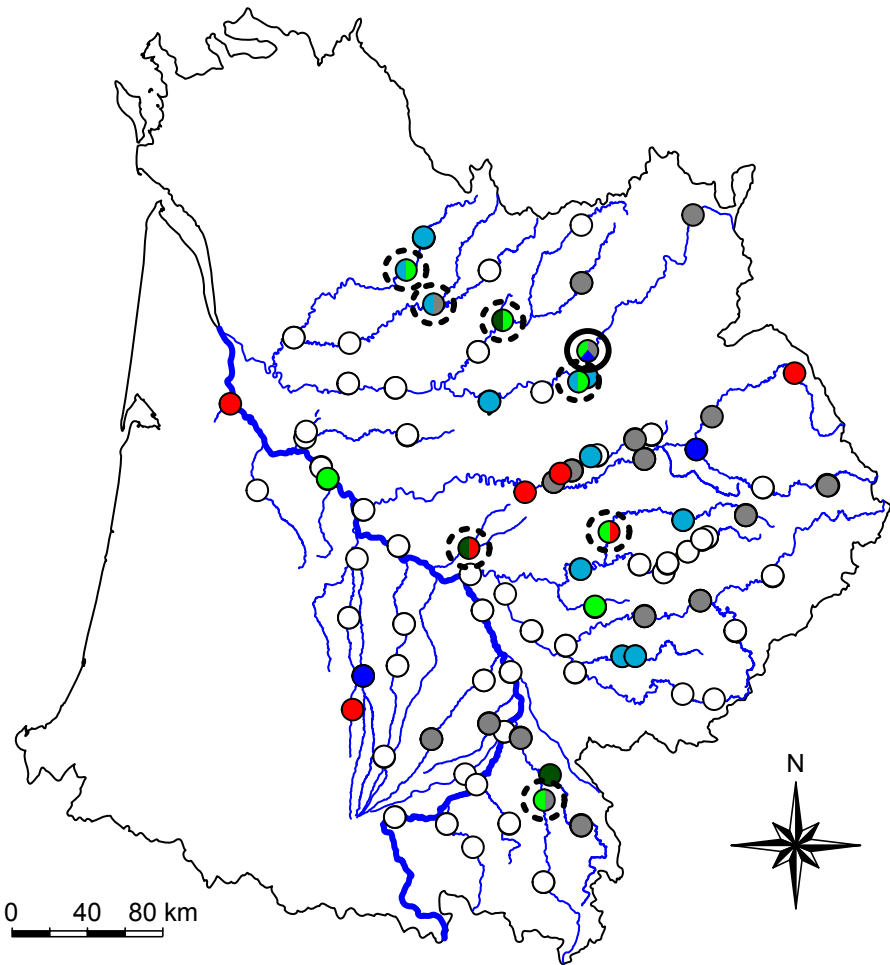

- Non-irreplaceable site
  - *S. cephalus* (7)
  - *G. occitaniae* (3)
  - *B. barbatula* (8)
  - *P. phoxinus* (18)
  - *P. toxostoma* (3)
  - *L. burdigalensis* (11)
  - Irreplaceable site (for at least two species)
  - Irreplaceable site (for at least three species)
- Irreplaceable site (for at least one species)
